# Supplementary material for: Local ionic transport enables selective PGM-free bipolar membrane electrode assembly
Source: PubMed Central journal article supplement — Nat Commun. 2024 Sep 19;15:8222. doi: 10.1038/s41467-024-52409-z (PMC11413168; doi:10.1038/s41467-024-52409-z), 2024-09-19
Supplement: 41467_2024_52409_MOESM1_ESM.pdf [file 41467_2024_52409_MOESM1_ESM.pdf]

## Supplementary Information

### Local ionic transport enables selective PGM-free bipolar membrane electrode assembly

Mengran Li<sup>1,2,\*</sup>, Eric W. Lees<sup>3,4,£</sup>, Wen Ju<sup>5,6,£</sup>, Siddhartha Subramanian<sup>1</sup>, Kailun Yang<sup>1</sup>, Justin C. Bui<sup>7,8</sup>, Hugo-Pieter Iglesias van Montfort<sup>1</sup>, Maryam Abdinejad<sup>1,9</sup>, Joost Middelkoop<sup>1</sup>, Peter Strasser<sup>5</sup>, Adam Z. Weber<sup>3</sup>, Alexis T. Bell<sup>7,8</sup>, Thomas Burdyny<sup>1,\*</sup>

1. Department of Chemical Engineering, Delft University of Technology; 9 van der Maasweg, Delft, 2629HZ, the Netherlands
2. Department of Chemical Engineering, the University of Melbourne, Melbourne, Victoria, 3010, Australia
3. Energy Technologies Area, Lawrence Berkeley National Laboratory, Berkeley, CA 94720, USA
4. Department of Chemical and Biological Engineering, The University of British Columbia, 2360 East Mall, Vancouver, British Columbia, V6T 1Z3, Canada.
5. Chemical Engineering Division, Department of Chemistry, Technical University Berlin, Berlin, Germany
6. Department of Electrochemistry and Catalysis, Leibniz Institute for Catalysis, 18059, Rostock, Germany
7. Chemical Sciences Division, Lawrence Berkeley National Laboratory, Berkeley, CA 94720, USA
8. Department of Chemical and Biological Engineering, University of California Berkeley, Berkeley, CA 94720, USA
9. Department of Chemical Engineering, Massachusetts Institute of Technology, Cambridge, MA 02139 USA

£ M. Li, E. W. Lees, and J. Wen contributed equally to this work.

\*Correspondence to:

M. Li: [aaron.li1@unimelb.edu.au](mailto:aaron.li1@unimelb.edu.au)

T. Burdyny: [t.e.burdyny@tudelft.nl](mailto:t.e.burdyny@tudelft.nl)

## Theory and model development

A 1D isothermal continuum model was developed for the cation exchange layer (CEL) and catalyst layer (CL) of the BPM-based CO<sub>2</sub> electrolyser MEA based on previous porous electrode models by Weng *et al.*<sup>1</sup> and Lees *et al.*<sup>2</sup> (Fig. S1). The CL domain of the model was assumed to be composed of gas, Sustainion ionomer, and solid NiNC-IMI catalyst phases with constant volume fractions of 0.37, 0.43, and 0.2, respectively. These values correspond to the volume fractions of the ionomer and catalyst in the ink precursor. The CEL domain was assumed to be impermeable to gas transport and composed entirely of Sustainion ionomer.

### Governing equations

The current density ( $i_s$ ) and potential ( $\phi_s$ ) profiles in the solid-fraction of the catalyst layer were determined using Ohm's law,

$$i_s = -\nabla \cdot (\sigma_{\text{eff}} \phi_s) \quad \text{Eq. S1}$$

where the effective conductivity ( $\sigma_{\text{eff}}$ ) is estimated based on the nominal conductivity of solid silver  $\sigma_s$  using the Bruggeman relation,

$$\sigma_{\text{eff}} = \varepsilon_s^{1.5} \sigma_s \quad \text{Eq. S2}$$

Steady-state continuity equations were used to determine the flux ( $n$ ) of each chemical species  $j$  in the gas-phase ( $j = \text{CO}_{2(\text{g})}$ ,  $\text{CO}_{(\text{g})}$ ,  $\text{H}_{2(\text{g})}$ , and  $\text{H}_2\text{O}_{(\text{g})}$ ) and  $i$  in the ionomer-phase species  $i$  ( $i = \text{H}^+_{(\text{aq})}$ ,  $\text{OH}^-_{(\text{aq})}$ ,  $\text{HCO}_3^-_{(\text{aq})}$ ,  $\text{CO}_3^{2-}_{(\text{aq})}$ , and  $\text{K}^+_{(\text{aq})}$ ),

$$\nabla \cdot n_j = \varepsilon_G \sum_j R_{k,j} \quad \text{Eq. S3}$$

$$\nabla \cdot n_i = \varepsilon_I \sum_i R_{k,i} \quad \text{Eq. S4}$$

where  $\varepsilon_G$  is the gas-volume fraction in the CL,  $\varepsilon_I$  is the volume fraction of ionomer in the catalyst layer, and  $R_{k,i}$  is the volumetric rate of generation/consumption by process  $k$  of species  $j$  or  $i$ . The gas-phase fluxes ( $n_j$ ) were determined using a system of Stefan-Maxwell equations for multi-component mass transport,

$$n_j = -\rho_g D_j^{\text{eff}} \nabla \omega_j - \rho_G D_j^{\text{eff}} \omega_j \frac{\nabla M_n}{M_n} + \rho_j u_G \quad \text{Eq. S5}$$

where  $\omega_j$  is the mass fraction of species  $j$ ,  $\rho_G$  is the density of the gas-phase,  $D_j^{\text{eff}}$  is the effective diffusion coefficients,  $M_n$  is the average molecular weight. The convective velocity of the gas-phase ( $u_G$ ) in the CL pores was determined as follows,

$$u_G = -\frac{\kappa_{sat,CL}\kappa_{rG,CL}}{\mu_G}\nabla p_G \quad \text{Eq. S6}$$

where  $\mu_G$  is the gas viscosity, and  $\kappa_{sat}^0$  is the bulk saturated permeability. The relative permeability ( $\kappa_{rG}$ ) of the gas-phase was estimated based on the correlation given by Zenyuk *et al.*,<sup>3</sup>

$$\kappa_{rg,CL} = \left(1 - \frac{\varepsilon_I}{\varepsilon_G + \varepsilon_I}\right)^3 \quad \text{Eq. S7}$$

The final equation used to solve the governing mass balances is given as,

$$\sum_j \omega_j = 1 \quad \text{Eq. S8}$$

The flux of each chemical species in the ionomer-phase ( $n_i$ ) was determined using the Nernst-Planck equation for dilute-solutions,

$$n_i = -D_i^{\text{eff}}\nabla c_i - z_i \frac{F}{RT} D_i^{\text{eff}} c_i \nabla \phi_I \quad \text{Eq. S9}$$

where  $z_i$  is the charge of the mobile ionic species,  $F$  is Faraday's constant (96485 C/mol),  $R$  is the ideal gas constant ( $8.314 \frac{J}{mol K}$ ),  $T$  is the temperature (298.15 K), and  $\phi_I$  is the ionomer-phase potential. The charge neutrality constraint was used as the final equation to solve the governing mass balance,

$$\sum_i z_i c_i + \rho_{ionomer} IEC_{ionomer} = 0 \quad \text{Eq. S10}$$

Where  $\rho_{ionomer}$  and  $IEC_{ionomer}$  are the density and ion exchange capacity of the ionomer (units: mol/g wet polymer) in either the CEL or CL.

#### *Charge transfer and source terms*

The electrochemical reactions consume reactants and generate products at the ionomer/solid interface according to Faraday's Law,

$$R_{CT,i} = -M_i \frac{a_v s_{i,k} i_k}{n_k F} \quad \text{Eq. S11}$$

where  $M_i$  is the molar mass of species  $i$ ,  $a_v$  is the specific surface area of the catalyst layer,  $s_{i,k}$  is the stoichiometric coefficient for species  $i$  in reaction  $k$ . We considered the specific surface area ( $a_v$ ) to be the interfacial area between the ionomer and solid Ni portions of the CL as follows,

$$a_v = \frac{\varepsilon_I}{\varepsilon_G + \varepsilon_I} a_v^0 \quad \text{Eq. S11}$$

where  $a_v^0$  is the specific surface area of the catalyst without ionomer. The kinetics of the electrochemical reactions are governed by concentration-dependent Butler-Volmer kinetics as given by as per Weng *et al.*,<sup>1</sup>

$$i_{\text{CO}} = -i_{0,\text{CO}} \left( \frac{c_{\text{CO}_2}}{1 \text{ M}} \right)^{1.5} \exp \left( -\frac{\alpha_{c,\text{CO}} F}{RT} \eta_{\text{CO}} \right) \quad \text{Eq. S12}$$

$$i_{\text{H}_2} = -i_{0,\text{H}_2} \left( -\frac{\alpha_{c,\text{HER}} F}{RT} \eta_{\text{HER}} \right) \quad \text{Eq. S13}$$

Where  $i_{0,\text{CO}_2\text{R}}$  and  $i_{0,\text{H}_2}$  are the exchange current densities for the CO<sub>2</sub>-to-CO reaction and hydrogen evolution reaction (HER), respectively.  $\alpha_{c,\text{HER}}$  and  $\alpha_{c,\text{CO}}$  are the transfer coefficients for the HER and CO<sub>2</sub>R, respectively. The pH-dependent kinetics of the HER are given by Weng *et al.*,<sup>4</sup>

$$i_{0,\text{H}_2} = A_{\text{HER}} \exp \left( -\frac{(83 + \text{pH}) \left[ \frac{\text{kJ}}{\text{mol}} \right]}{RT} \right) \quad \text{Eq. S14}$$

Where  $A_{\text{HER}}$  is the collision frequency for the HER. The overpotential of electrochemical reaction  $k$  was determined based on the standard reduction potential ( $U_k^0$ ) and the pH according to the Nernst equation,

$$\eta_k = \phi_s - \phi_l - \left( U_k^0 - \frac{2.303RT}{F} \text{pH} \right) \quad \text{Eq. S15}$$

The source terms associated with the acid-base reactions in the ionomer were determined as,

$$R_{B,i} = M_i \sum_i s_{i,n} \left( k_n \prod_{s_{i,n} < 0} c_i^{-s_{i,n}} - \frac{k_n}{K_n} \prod_{s_{i,n} > 0} c_i^{s_{i,n}} \right) \quad \text{Eq. S16}$$

where  $K_n$  is the equilibrium constant of homogeneous reaction  $n$ ,  $s_{i,n}$  is the stoichiometric coefficient of species  $i$  in homogeneous bulk reaction  $n$  ( $s_{i,n} < 0$  for reactants and  $s_{i,n} > 0$  for products).  $k_n$  and  $k_{-n}$  are the forward and reverse reaction rate constants for reaction  $n$ , respectively. The phase-transfer term for  $\text{CO}_2$  at the gas-ionomer interface was calculated using a mass transfer correlation,

$$R_{PT,\text{CO}_2} = a_v k_{GL,\text{CO}_2} M_{\text{CO}_2} (H_{\text{CO}_2} p_g y_{\text{CO}_2} - c_{\text{CO}_2}) \quad \text{Eq. S17}$$

where  $H_{\text{CO}_2}$  is the Henry's Law coefficient for  $\text{CO}_2$  dissolved in water,  $y_{\text{CO}_2}$  is the mole fraction of  $\text{CO}_2$  in the gas-phase, and  $k_{GL,\text{CO}_2}$  is the mass transfer coefficient for  $\text{CO}_2$  through the ionomer film on the catalyst surface,

$$k_{GL,\text{CO}_2} = \frac{D_{\text{CO}_2,w}}{\delta_{DL}} \quad \text{Eq. S18}$$

where  $D_{\text{CO}_2,w}$  is the diffusion coefficient of  $\text{CO}_2$  in water and  $\delta_{DL}$  is the diffusion boundary layer thickness. This value was estimated based on the pore structure and volume fraction of ionomer as per Weng *et al.*,<sup>1</sup>

$$\delta_{TF} = r_{CL} \left( 1 - \sqrt{1 - \frac{\varepsilon_I}{\varepsilon_G + \varepsilon_I}} \right) \quad \text{Eq. S19}$$

$\text{CO}$  and  $\text{H}_2$  were assumed to be insoluble in the ionomer and therefore the rate of  $\text{CO}$  and  $\text{H}$  generation gas-phase were also calculated by Faraday's Law,

$$R_{PT,j} = -M_i \frac{a_v s_{j,k} i_k}{n_k F} \quad \text{Eq. S20}$$

### *Effective diffusion coefficients*

The effective diffusion coefficients for the gas-phase species ( $D_j^{\text{eff}}$ ) were determined by considering the molecular and Knudsen diffusivities as parallel resistances as follows,

$$D_j^{\text{eff}} = \left( \frac{1}{D_j^m} + \frac{1}{D_j^K} \right)^{-1} \quad \text{Eq. S21}$$

$$D_j^m = \frac{1 - \omega_j}{\sum_{b \neq j} \frac{y_b}{D_{j,b}}} \quad \text{Eq. S22}$$

$$D_j^K = \frac{2r_{pore}}{3} \sqrt{\frac{8RT}{\pi M_j}} \quad \text{Eq. S23}$$

Where  $D_j^m$  and  $D_j^K$  are the mass-averaged molecular and Knudsen diffusion coefficients, respectively, of species  $j$ .  $r_{pore}$  is the CL pore radius and  $y_b$  is the mole fraction of another component gas  $b$ .  $D_{j,b}$  is the diffusivity of species  $j$  in species  $b$ , which was estimated based on the Fuller method.<sup>5</sup>

The effective diffusion coefficients for the chemical species in the ionomer-phase ( $D_i^{eff}$ ) were determined based on the porosity and hydration ( $\lambda$ ) of the ionomer as per Grew *et al.*<sup>6</sup> These equations considers ion transport through the water-filled pore volume of the ionomer ( $\Phi$ ),

$$D_i^{eff} = \frac{\Phi^{q_i} D_{i,w}}{x_w(1 + \psi_i)} \quad \text{Eq. S24}$$

$$\Phi = \frac{\lambda V_W}{\lambda V_W + V_M} \quad \text{Eq. S25}$$

$$x_w = \frac{\lambda}{\lambda + 1} \quad \text{Eq. S26}$$

$\psi_i$  is the ratio between species-solvent and species-membrane interaction effects, which is defined based on the reduced molecular weight of species  $i$  in the membrane ( $M_{i,M}$ ) and in water ( $M_{i,w}$ ),

$$\psi_i = \frac{1}{\lambda} \left(\frac{V_M}{V_w}\right)^{\frac{2}{3}} \left(\frac{M_{i,M}}{M_{i,w}}\right)^{\frac{1}{2}} \quad \text{Eq. S27}$$

$$M_{i,M} = \left(\frac{1}{M_i} + \frac{1}{M_M}\right)^{-1} \quad \text{Eq. S28}$$

$$M_{i,w} = \left(\frac{1}{M_i} + \frac{1}{M_w}\right)^{-1} \quad \text{Eq. S29}$$

where  $V_w$  is the molar volume of water and the molecular weight of the membrane ( $M_M$ ) is estimated as 10,000 g mol<sup>-1</sup>. The molar volume of the membrane ( $V_M$ ) was calculated based on the ion exchange capacity (IEC) and the density of the ionomer ( $\rho_{ionomer}$ ),

$$V_M = \frac{1}{\rho_{ionomer} IEC} \quad \text{Eq. S30}$$

$q_i$  is a tortuosity parameter set to values of 1.5 for co-ion transport (e.g.,  $\text{CO}_3^{2-}$  transport in the cation exchange ionomer of the CEL) and 1 for counter-ion transport (e.g.,  $\text{OH}^-$  transport in the Sustainion ionomer of the CL).  $V_W$  is the molar volume of water,  $V_M$  is the molar volume of water in the polymer, and  $x_w$  is the mole fraction of water in the ionomer.

The hydration of the CEL ionomer  $\lambda_{\text{CEL}}$  was estimated by interpolating between the experimentally-measured values for the CEL of a BPM in  $\text{K}^+$  and  $\text{H}^+$  forms as per Bui *et al.*,<sup>7</sup>

$$\lambda_{\text{CEL}} = \lambda_{x_{\text{H}^+}=0} + x_{\text{H}^+} \lambda_{x_{\text{H}^+}=1} \quad \text{Eq. S31}$$

where  $\lambda_{x_{\text{H}^+}=0} = 6$  and  $\lambda_{x_{\text{H}^+}=1} = 9$  are the hydration values obtained from fitting experimental electro dialysis data<sup>6</sup> and  $x_{\text{H}^+}$  is the fraction of negatively-charged groups in the CEL that are charge-balanced by  $\text{H}^+$ ,

$$x_{\text{H}^+} = \frac{c_{\text{H}^+}}{\rho_{\text{CEL}} IEC_{\text{CEL}}} \quad \text{Eq. S32}$$

The hydration value of the Sustainion ionomer ( $\lambda_{\text{Sustainion}}$ ) was calculated by interpolating the values measured by Luo *et al.*<sup>8</sup> for  $\text{CO}_3^{2-}$  and  $\text{OH}^-$  forms of Sustainion at 100% relative humidity,

$$\lambda_{\text{Sustainion}} = \lambda_{x_{\text{CO}_3^{2-}}=0} + x_{\text{CO}_3^{2-}} \lambda_{x_{\text{CO}_3^{2-}}=1} \quad \text{Eq. S33}$$

Where  $x_{\text{CO}_3^{2-}}$  is given as,

$$x_{\text{CO}_3^{2-}} = \frac{c_{\text{CO}_3^{2-}}}{\rho_{\text{AEL}} IEC_{\text{AEL}}} \quad \text{Eq. S34}$$

*Boundary conditions and Donnan equilibrium*

The 1D model domain is shown in Figure S1. The water dissociation interface of the BPM exists at the left-hand side of the model domain. At this interface, the ionic fluxes were defined based on the transference number for  $H^+$  ( $t_{H^+}$ ) as per Lees *et al.*,<sup>6</sup>

$$n_{H^+}|_{x=0} = -t_{H^+} \int_{x=L_{CEL}}^{x=L_{CEL}+L_{CL}} \frac{(i_{CO} + i_{H_2})}{n_{WD}F} dx \quad \text{Eq. S35}$$

$$n_{K^+}|_{x=0} = -(1 - t_{H^+}) \int_{x=L_{CEL}}^{x=L_{CEL}+L_{CL}} \frac{(i_{CO} + i_{H_2})}{n_{WD}F} dx \quad \text{Eq. S36}$$

where  $n_{WD}$  is the moles of  $H^+$  produced by water dissociation per mole of electron passed through the circuit. The measured  $t_{H^+}$  value from the BPMEA cell experiment with 0.1 M KOH as the anolyte was used in the model. The flux of all other species in the ionomer was assumed to be 0 at the water dissociation interface, given that the titration experiment performed after electrolysis showed low carbonate crossover to the anolyte (<1% of the total charge passed),

$$n_{i \neq K^+, H^+}|_{x=0} = 0 \quad \text{Eq. S37}$$

The reference potential for the ionomer-phase was also defined at the water dissociation interface,

$$\phi_l|_{x=0} = 0 \quad \text{Eq. S38}$$

The potential and concentration profiles at the interface between the CEL and Sustainion ionomer in the CL were determined based on the Donnan equilibrium,

$$\phi_l|_{x=L_{CEL}^-} = \phi_l|_{x=L_{CEL}^+} - \frac{RT}{z_i F} \ln \left( \frac{c_{i,x=L_{CEL}^+}}{c_{i,x=L_{CEL}^-}} \right) \quad \text{Eq. S39}$$

where  $c_{i,x=L_{CEL}^+}$  and  $c_{i,x=L_{CEL}^-}$  are the concentrations of species  $i$  in the Sustainion CL ionomer and CEL membrane, respectively. A Dirichlet boundary condition was imposed on the concentration of chemical species in the ionomer at the CL/GDL interface,

$$c_i|_{x=L_{CEL}+L_{CL}} = c_i^{\text{Bulk}} \quad \text{Eq. S40}$$

where  $c_i^{\text{Bulk}}$  is the bulk electrolyte composition corresponding to 1 M  $KHCO_{3(aq)}$  under a  $CO_2$ -saturated atmosphere (pH = 7.6). The  $CO_2$  concentration in the bulk is calculated according to Henry's Law,



$$c_{\text{CO}_2}^{\text{Bulk}} = H_{\text{CO}_2} p_g y_{\text{CO}_2} \quad \text{Eq. S41}$$

The flux of chemical species  $j$  in the gas-phase was set to 0 at the CEL/CL interface and a mass transfer correlation was used to simulate the transport of  $\text{CO}_2$ ,  $\text{H}_2\text{O}$ ,  $\text{CO}$ , and  $\text{H}_2$  through the gas diffusion layer,

$$n_j|_{x=L_{\text{CEL}}} = 0 \quad \text{Eq. S42}$$

$$n_j|_{x=L_{\text{CEL}}+L_{\text{CL}}} = -k_{\text{MT}}(\omega_j^{\text{Bulk}} - \omega_j|_{x=L_{\text{CEL}}+L_{\text{CL}}}) \quad \text{Eq. S43}$$

where  $\omega_j^{\text{Bulk}}$  represent the mass fraction of chemical species  $j$  in the bulk humidified  $\text{CO}_2$  stream.  $\omega_j|_{x=L_{\text{CEL}}+L_{\text{CL}}}$  is the mass fraction at the CL/GDL interface and  $k_{\text{MT}}$  is a mass transfer coefficient for a flat-plate geometry as per Weng *et al.*<sup>1</sup> The pressure at the CL/GDL interface was set to 1 atm to solve the momentum balance,

$$p_G|_{x=L_{\text{CEL}}+L_{\text{CL}}} = 1 \text{ atm} \quad \text{Eq. S44}$$

Finally, the solid-phase potential at the CL/GDL interface was varied from  $-1.5$  to  $-2.5$  V to simulate different current densities. Table S1 below shows the pertinent parameters used in the governing equations and boundary conditions.

**Table S1: 1D continuum model parameters**

| Parameter                          | Value                 | Unit                              | Reference<br>(in Supplementary<br>Information) |
|------------------------------------|-----------------------|-----------------------------------|------------------------------------------------|
| CL properties                      |                       |                                   |                                                |
| $L_{CL}$                           | 10                    | $\mu\text{m}$                     | Experiment                                     |
| $a_v^0$                            | $1 \times 10^7$       | $\text{m}^{-1}$                   | 1                                              |
| $\varepsilon_G$                    | 0.37                  | —                                 | Experiment                                     |
| $\varepsilon_I$                    | 0.43                  | —                                 | Experiment                                     |
| $\varepsilon_S$                    | 0.20                  | —                                 | Experiment                                     |
| $\kappa_{sat,CL}^0$                | $8 \times 10^{-16}$   | $\text{m}^2$                      | 1                                              |
| $\sigma_S$                         | 100                   | $\text{S cm}^{-1}$                | 1                                              |
| $r_{CL}$                           | 5                     | $\mu\text{m}$                     | 2                                              |
| $\lambda_{x_{\text{CO}_3^{2-}}=1}$ | 11                    | —                                 | 5                                              |
| $\lambda_{x_{\text{CO}_3^{2-}}=0}$ | 25                    | —                                 | 5                                              |
| CEL properties                     |                       |                                   |                                                |
| $L_{CEL}$                          | 75                    | $\mu\text{m}$                     | 4                                              |
| $\rho_M$                           | 1                     | $\text{g mL}^{-1}$                | 4                                              |
| $IEC$                              | 1.81                  | $\text{mmol g}^{-1}$              | 4                                              |
| $\lambda_{x_{\text{H}^+}=1}$       | 9                     | —                                 | 4                                              |
| $\lambda_{x_{\text{H}^+}=0}$       | 6                     | —                                 | 4                                              |
| $t_{\text{H}^+}$                   | 0.99                  | —                                 | Experiment                                     |
| Homogeneous<br>Reactions           |                       |                                   |                                                |
| $k_1$                              | $3.71 \times 10^{-2}$ | $\text{s}^{-1}$                   | 1                                              |
| $K_1$                              | $10^{-6.37}$          | M                                 | 1                                              |
| $k_2$                              | 59.44                 | $\text{s}^{-1}$                   | 1                                              |
| $K_2$                              | $10^{-10.32}$         | M                                 | 1                                              |
| $k_3$                              | $2.2 \times 10^3$     | $\text{L mol}^{-1} \text{s}^{-1}$ | 1                                              |
| $k_4$                              | $6.0 \times 10^9$     | $\text{L mol}^{-1} \text{s}^{-1}$ | 1                                              |

|                                         |                       |                |                   |
|-----------------------------------------|-----------------------|----------------|-------------------|
| $K_W$                                   | $10^{-14}$            | $M^2$          | 1                 |
| Electrochemical Reactions               |                       |                |                   |
| $U_{CO}^0$                              | -0.11                 | V              | 1                 |
| $i_{0,CO}$                              | $1.05 \times 10^{-4}$ | $mA\ cm^{-2}$  | Fit value         |
| $\alpha_{c,CO}$                         | 0.30                  | —              | Fit value         |
| $U_{HER}^0$                             | 0                     | V              | 1                 |
| $i_{0,HER,acid}$                        | 0.63                  | $mA\ cm^{-2}$  | Fit value         |
| $\alpha_{c,HER}$                        | 0.47                  | —              | Fit value         |
| $A_{HER}$                               | 8840                  | $mA\ cm^{-2}$  | Fit value         |
| Bulk concentrations in the liquid phase |                       |                |                   |
| $c_{H^+}^{Bulk}$                        | $10^{-7.6}$           | M              | Equilibrium       |
| $c_{K^+}^{Bulk}$                        | 1                     | M              | Electroneutrality |
| $c_{OH^-}^{Bulk}$                       | $10^{-6.4}$           | M              | Equilibrium       |
| $c_{HCO_3^-}^{Bulk}$                    | 1                     | M              | Electroneutrality |
| $c_{CO_3^{2-}}^{Bulk}$                  | 0                     | M              | Equilibrium       |
| Liquid phase transport                  |                       |                |                   |
| $D_{H^+,w}$                             | $9.31 \times 10^{-5}$ | $cm^2\ s^{-1}$ | 1                 |
| $D_{K^+,w}$                             | $1.96 \times 10^{-5}$ | $cm^2\ s^{-1}$ | 1                 |
| $D_{OH^-,w}$                            | $4.95 \times 10^{-5}$ | $cm^2\ s^{-1}$ | 1                 |
| $D_{HCO_3^-,w}$                         | $1.19 \times 10^{-5}$ | $cm^2\ s^{-1}$ | 1                 |
| $D_{CO_3^{2-},w}$                       | $0.80 \times 10^{-5}$ | $cm^2\ s^{-1}$ | 1                 |
| $D_{CO_2,w}$                            | $1.66 \times 10^{-5}$ | $cm^2\ s^{-1}$ | 1                 |
| Bulk mass fractions for the gas phase   |                       |                |                   |
| $\omega_{CO}^{Bulk}$                    | 0                     | —              | Inlet conditions  |
| $\omega_{H_2}^{Bulk}$                   | 0                     | —              | Inlet conditions  |
| $\omega_{CO_2}^{Bulk}$                  | 0.779                 | —              | Inlet conditions  |
| $\omega_{H_2O}^{Bulk}$                  | 0.221                 | —              | Inlet conditions  |

## Supplementary data

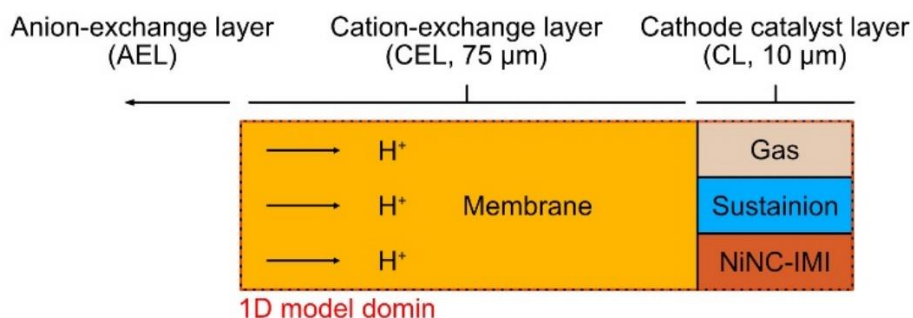

**Fig. S1 Schematic diagram of 1D continuum model domains for the studied cation exchange layer (CEL) for the BPM and catalyst layer (CL) based on NiNC-IMI catalyst embedded with Sustainion ionomer.**

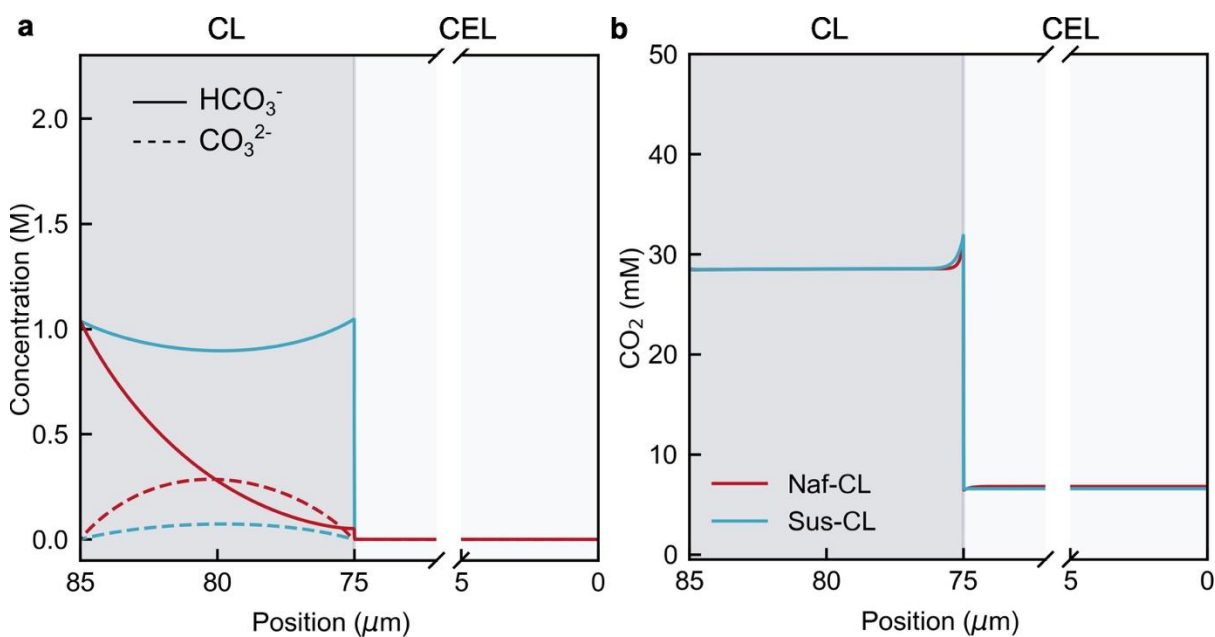

**Fig. S2 Comparison of the modelled concentrations of  $\text{HCO}_3^-$ ,  $\text{CO}_3^{2-}$ , and  $\text{CO}_2$  for Naf-CLs and Sus-CLs across CL and CEL.** The Naf-CLs represent the catalyst layer based with Nafion ionomer and Sus-CLs represent the ones based with Sustainion ionomer. The position between 0-75  $\mu\text{m}$  is for the modelled CEL; the position between 75-85  $\mu\text{m}$  is for CL.

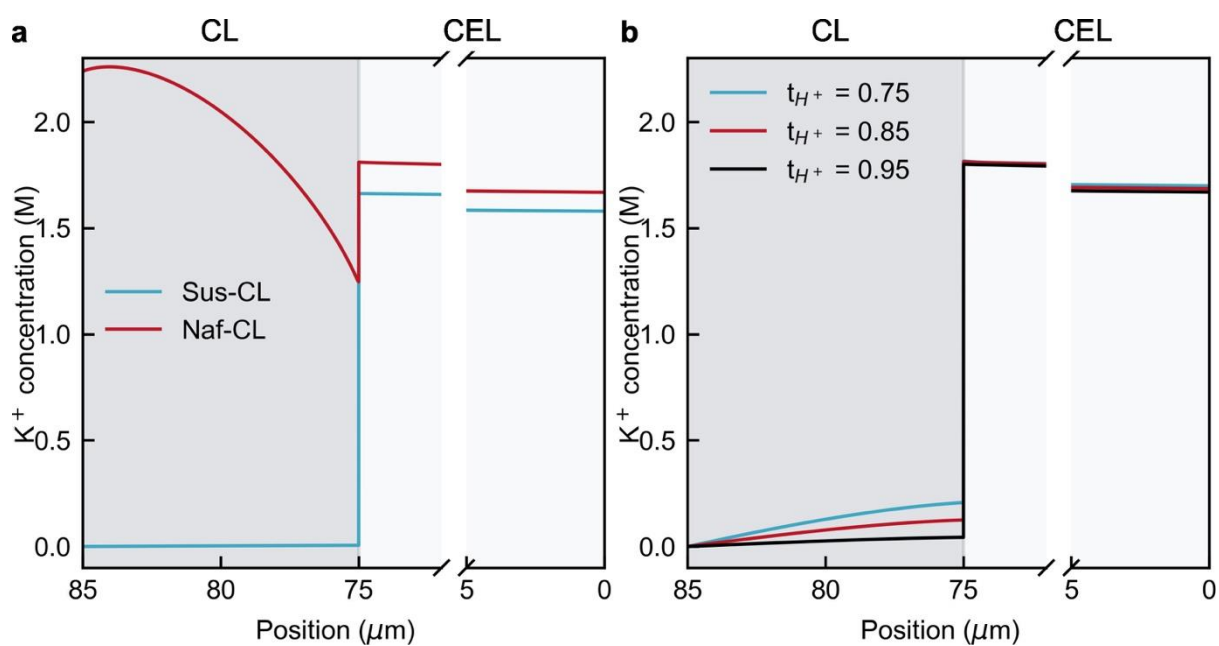

**Fig. S3** Concentration profiles of  $K^+$  for (a) CLs based with Sustainion (Sus-CL) or Nafion (Naf-CL) ionomers and (b) proton transference numbers (denoted as  $t_{H^+}$ ) across the CLs and CEL.

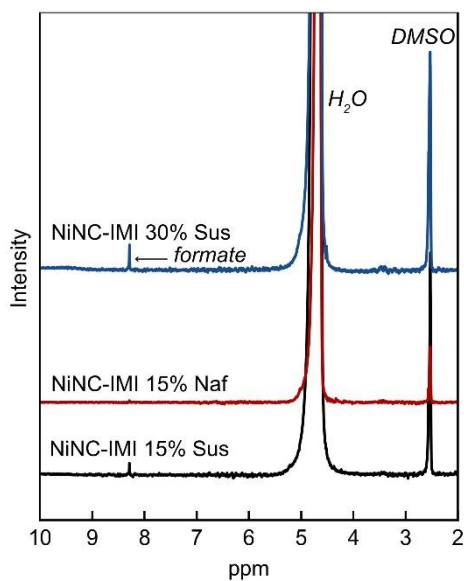

**Fig. S 4 Comparison of the nuclear magnetic resonance spectroscopy results for analytes after CO<sub>2</sub> electrolysis performance test of BPMEAs with different CLs based on 30% Sustainion ionomer (NiNC-IMI 30% Sus), 15% Nafion ionomer (NiNC-IMI 15% Naf), and 15% Sustainion ionomer (NiNC-IMI 15%).** Dimethyl sulfoxide (DMSO) is the internal reference to quantify the liquid products (*i.e.*, formate in this study) produced from CO<sub>2</sub> electroreduction and transported to the anolyte.

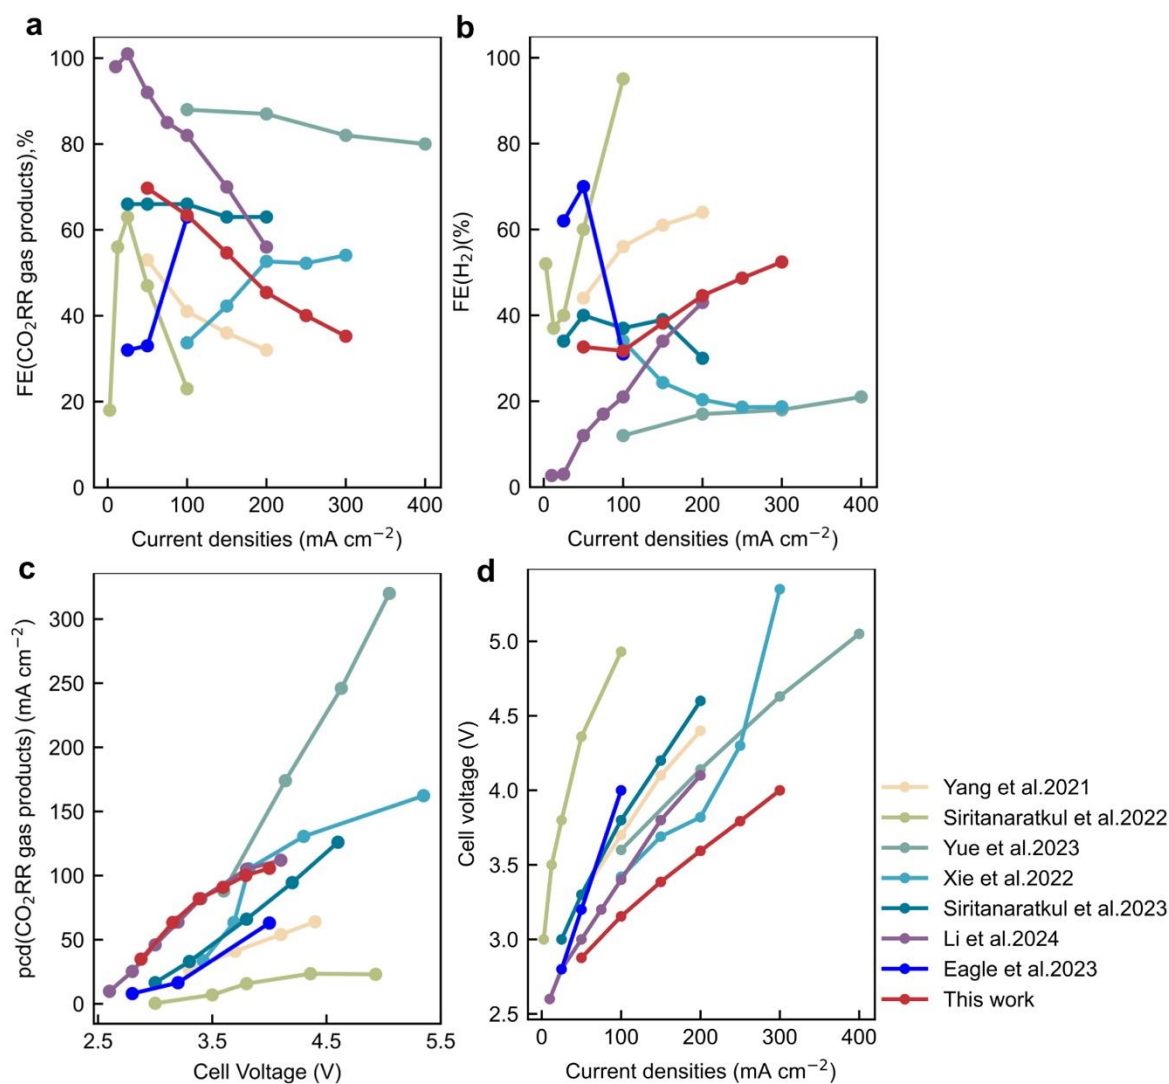

**Fig. S5 Performance comparison with literature data. Comparison of (a) FEs for CO<sub>2</sub> reduction reaction (CO<sub>2</sub>RR) gaseous products, (b) FEs for H<sub>2</sub>, (c) partial current density of CO<sub>2</sub>RR gaseous product, and (d) cell voltages of BPMEA with NiNC-IMI 15% Sus CL as cathode with recently reported literature data by Yang et al.<sup>9</sup>, Siritanaratkul et al.<sup>10,11</sup>, Yue et al.<sup>12</sup>, Xie et al.<sup>13</sup>, Li et al.<sup>14</sup>, and Eagle et al.<sup>15</sup>.**

**Table S 1 Summary of the literature data for comparison.**

| Current density (mA cm <sup>-2</sup> ) | FE(CO <sub>2</sub> RR, gas), % | FE(H <sub>2</sub> ), % | Cell voltage, V | Cathode                                            | Cathode ionomer | Membrane    | Anode                                 | Anolyte          | Gas product                       | Remarks                                                         | Refs                                    |
|----------------------------------------|--------------------------------|------------------------|-----------------|----------------------------------------------------|-----------------|-------------|---------------------------------------|------------------|-----------------------------------|-----------------------------------------------------------------|-----------------------------------------|
| 50                                     | 53                             | 44                     | 3.3             | 100 nm sputtered Ag @ Sigracet 39BC                | N.A.            | Fumasep FBM | Ni Foam                               | 1M KOH           | CO                                | N.A.                                                            | Yang et al.2021 <sup>9</sup>            |
| 100                                    | 41                             | 56                     | 3.7             | 100 nm sputtered Ag @ Sigracet 39BC                | N.A.            | Fumasep FBM | Ni Foam                               | 1M KOH           | CO                                | N.A.                                                            | Yang et al.2021 <sup>9</sup>            |
| 150                                    | 36                             | 61                     | 4.1             | 100 nm sputtered Ag @ Sigracet 39BC                | N.A.            | Fumasep FBM | Ni Foam                               | 1M KOH           | CO                                | N.A.                                                            | Yang et al.2021 <sup>9</sup>            |
| 200                                    | 32                             | 64                     | 4.4             | 100 nm sputtered Ag @ Sigracet 39BC                | N.A.            | Fumasep FBM | Ni Foam                               | 1M KOH           | CO                                | N.A.                                                            | Yang et al.2021 <sup>9</sup>            |
| 2.5                                    | 18                             | 52                     | 3               | [Ni(Cyc)] <sub>2</sub> + @Sigracet 39BC            | Nafion          | Fumasep FBM | RuO <sub>2</sub> coated Sigracet 39BC | H <sub>2</sub> O | CO                                | N.A.                                                            | Siritanaratkul et al.2022 <sup>14</sup> |
| 12.5                                   | 56                             | 37                     | 3.5             | [Ni(Cyc)] <sub>2</sub> + @Sigracet 39BC            | Nafion          | Fumasep FBM | RuO <sub>2</sub> coated Sigracet 39BC | H <sub>2</sub> O | CO                                | N.A.                                                            | Siritanaratkul et al.2022 <sup>14</sup> |
| 25                                     | 63                             | 40                     | 3.8             | [Ni(Cyc)] <sub>2</sub> + @Sigracet 39BC            | Nafion          | Fumasep FBM | RuO <sub>2</sub> coated Sigracet 39BC | H <sub>2</sub> O | CO                                | N.A.                                                            | Siritanaratkul et al.2022 <sup>14</sup> |
| 50                                     | 47                             | 60                     | 4.36            | [Ni(Cyc)] <sub>2</sub> + @Sigracet 39BC            | Nafion          | Fumasep FBM | RuO <sub>2</sub> coated Sigracet 39BC | H <sub>2</sub> O | CO                                | N.A.                                                            | Siritanaratkul et al.2022 <sup>14</sup> |
| 100                                    | 23                             | 95.07                  | 4.93            | [Ni(Cyc)] <sub>2</sub> + @Sigracet 39BC            | Nafion          | Fumasep FBM | RuO <sub>2</sub> coated Sigracet 39BC | H <sub>2</sub> O | CO                                | N.A.                                                            | Siritanaratkul et al.2022 <sup>14</sup> |
| 100                                    | 88                             | 12                     | 3.6             | 0.5 mg cm <sup>-2</sup> Ni SAC@ Freudenberg H14C9  | Nafion          | Fumasep FBM | Ni Foam                               | 1M KOH           | CO                                | 23wt% Nafion compared to catalyst loading in the catalyst layer | Yue et al.2023 <sup>12</sup>            |
| 200                                    | 87                             | 17                     | 4.14            | 0.5 mg cm <sup>-2</sup> Ni SAC@ Freudenberg H14C10 | Nafion          | Fumasep FBM | Ni Foam                               | 1M KOH           | CO                                | 23wt% Nafion compared to catalyst loading in the catalyst layer | Yue et al.2023 <sup>12</sup>            |
| 300                                    | 82                             | 18                     | 4.63            | 0.5 mg cm <sup>-2</sup> Ni SAC@ Freudenberg H14C11 | Nafion          | Fumasep FBM | Ni Foam                               | 1M KOH           | CO                                | 23wt% Nafion compared to catalyst loading in the catalyst layer | Yue et al.2023 <sup>12</sup>            |
| 400                                    | 80                             | 21                     | 5.05            | 0.5 mg cm <sup>-2</sup> Ni SAC@ Freudenberg H14C12 | Nafion          | Fumasep FBM | Ni Foam                               | 1M KOH           | CO                                | 23wt% Nafion compared to catalyst loading in the catalyst layer | Yue et al.2023 <sup>12</sup>            |
| 100                                    | 34                             | 34                     | 3.42            | 1 mg cm <sup>-2</sup> Cu NP on carbon paper        | Nafion          | Fumasep FBM |                                       |                  | CO, C <sub>2</sub> H <sub>4</sub> | 65 um stationary catholyte layer                                | Xie et al.2022 <sup>13</sup>            |



|            |     |     |      |                                                                                                                       |        |             |                                         |                         |                                   |                                                                |                                         |
|------------|-----|-----|------|-----------------------------------------------------------------------------------------------------------------------|--------|-------------|-----------------------------------------|-------------------------|-----------------------------------|----------------------------------------------------------------|-----------------------------------------|
| <b>150</b> | 42  | 24  | 3.69 | 1 mg cm <sup>-2</sup> Cu NP on carbon paper                                                                           | Nafion | Fumasep FBM | IrO <sub>2</sub> loaded Ti felt         | 0.1M KHC O <sub>3</sub> | CO, C <sub>2</sub> H <sub>4</sub> | 65 um stationary catholyte layer                               | Xie et al.2022 <sup>13</sup>            |
| <b>200</b> | 53  | 20  | 3.82 | 1 mg cm <sup>-2</sup> Cu NP on carbon paper                                                                           | Nafion | Fumasep FBM | IrO <sub>2</sub> loaded Ti felt         | 0.1M KHC O <sub>3</sub> | CO, C <sub>2</sub> H <sub>4</sub> | 65 um stationary catholyte layer                               | Xie et al.2022 <sup>13</sup>            |
| <b>250</b> | 52  | 19  | 4.3  | 1 mg cm <sup>-2</sup> Cu NP on carbon paper                                                                           | Nafion | Fumasep FBM | IrO <sub>2</sub> loaded Ti felt         | 0.1M KHC O <sub>3</sub> | CO, C <sub>2</sub> H <sub>4</sub> | 65 um stationary catholyte layer                               | Xie et al.2022 <sup>13</sup>            |
| <b>300</b> | 54  | 19  | 5.35 | 1 mg cm <sup>-2</sup> Cu NP on carbon paper                                                                           | Nafion | Fumasep FBM | IrO <sub>2</sub> loaded Ti felt         | 0.1M KHC O <sub>3</sub> | CO, C <sub>2</sub> H <sub>4</sub> | 65 um stationary catholyte layer                               | Xie et al.2022 <sup>13</sup>            |
| <b>25</b>  | 66  | 34  | 3    | CoPc/C on carbon paper                                                                                                | Nafion | Fumasep FBM | RuO <sub>2</sub> loaded on carbon paper | 1M KOH                  | CO                                | N.A.                                                           | Siritanaratkul et al.2023 <sup>15</sup> |
| <b>50</b>  | 66  | 40  | 3.3  | CoPc/C on carbon paper                                                                                                | Nafion | Fumasep FBM | RuO <sub>2</sub> loaded on carbon paper | 1M KOH                  | CO                                | N.A.                                                           | Siritanaratkul et al.2023 <sup>15</sup> |
| <b>100</b> | 66  | 37  | 3.8  | CoPc/C on carbon paper                                                                                                | Nafion | Fumasep FBM | RuO <sub>2</sub> loaded on carbon paper | 1M KOH                  | CO                                | N.A.                                                           | Siritanaratkul et al.2023 <sup>15</sup> |
| <b>150</b> | 63  | 39  | 4.2  | CoPc/C on carbon paper                                                                                                | Nafion | Fumasep FBM | RuO <sub>2</sub> loaded on carbon paper | 1M KOH                  | CO                                | N.A.                                                           | Siritanaratkul et al.2023 <sup>15</sup> |
| <b>200</b> | 63  | 30  | 4.6  | CoPc/C on carbon paper                                                                                                | Nafion | Fumasep FBM | RuO <sub>2</sub> loaded on carbon paper | 1M KOH                  | CO                                | N.A.                                                           | Siritanaratkul et al.2023 <sup>15</sup> |
| <b>10</b>  | 98  | 2.7 | 2.6  | covalently grafted cobalt tetraaminophthalocyanine onto a positively charged polyfluorene backbone (PF-CoTAPc)/carbon | Nafion | Fumasep FBM | Ni Foam                                 | 1M KOH                  | CO                                | The catalyst was first soaked in 1M KOH followed by pure water | Li et al.2024 <sup>14</sup>             |
| <b>25</b>  | 101 | 3   | 2.8  | covalently grafted cobalt tetraaminophthalocyanine onto a positively charged polyfluorene backbone (PF-CoTAPc)/carbon | Nafion | Fumasep FBM | Ni Foam                                 | 1M KOH                  | CO                                | The catalyst was first soaked in 1M KOH followed by pure water | Li et al.2024 <sup>14</sup>             |
| <b>50</b>  | 92  | 12  | 3    | covalently grafted cobalt tetraaminophthalocyanine onto a positively charged polyfluorene backbone (PF-CoTAPc)/carbon | Nafion | Fumasep FBM | Ni Foam                                 | 1M KOH                  | CO                                | The catalyst was first soaked in 1M KOH followed by pure water | Li et al.2024 <sup>14</sup>             |
| <b>75</b>  | 85  | 17  | 3.2  | covalently grafted cobalt tetraaminophthalocyanine onto a positively charged polyfluorene backbone (PF-CoTAPc)/carbon | Nafion | Fumasep FBM | Ni Foam                                 | 1M KOH                  | CO                                | The catalyst was first soaked in 1M KOH followed by pure water | Li et al.2024 <sup>14</sup>             |
| <b>100</b> | 82  | 21  | 3.4  | covalently grafted cobalt tetraaminophthalocyanine onto a positively charged polyfluorene backbone (PF-CoTAPc)/carbon | Nafion | Fumasep FBM | Ni Foam                                 | 1M KOH                  | CO                                | The catalyst was first soaked in 1M KOH followed by pure water | Li et al.2024 <sup>14</sup>             |

|            |      |              |     |                                                                                                                       |            |             |                   |          |    |                                                                |                                |
|------------|------|--------------|-----|-----------------------------------------------------------------------------------------------------------------------|------------|-------------|-------------------|----------|----|----------------------------------------------------------------|--------------------------------|
| <b>150</b> | 70   | 34           | 3.8 | covalently grafted cobalt tetraaminophthalocyanine onto a positively charged polyfluorene backbone (PF-CoTAPc)/carbon | Nafion     | Fumasep FBM | Ni Foam           | 1M KOH   | CO | The catalyst was first soaked in 1M KOH followed by pure water | Li et al.2024 <sup>14</sup>    |
| <b>200</b> | 56   | 43           | 4.1 | covalently grafted cobalt tetraaminophthalocyanine onto a positively charged polyfluorene backbone (PF-CoTAPc)/carbon | Nafion     | Fumasep FBM | Ni Foam           | 1M KOH   | CO | The catalyst was first soaked in 1M KOH followed by pure water | Li et al.2024 <sup>14</sup>    |
| <b>25</b>  | 32   | 62           | 2.8 | Mnbpy/MWCNT                                                                                                           | Nafion     | Fumasep FBM | RuO2 loaded on Ti | 1M KOH   | CO | N.A.                                                           | Eagle et al.2023 <sup>15</sup> |
| <b>50</b>  | 33   | 70           | 3.2 | Mnbpy/MWCNT                                                                                                           | Nafion     | Fumasep FBM | RuO2 loaded on Ti | 1M KOH   | CO | N.A.                                                           | Eagle et al.2023 <sup>15</sup> |
| <b>100</b> | 63   | 31           | 4   | Mnbpy/MWCNT                                                                                                           | Nafion     | Fumasep FBM | RuO2 loaded on Ti | 1M KOH   | CO | N.A.                                                           | Eagle et al.2023 <sup>15</sup> |
| <b>50</b>  | 69.7 | 32.6<br>31   | 2.9 | NiNC-IMI                                                                                                              | Sustainion | Fumasep FBM | Ni Foam           | 0.1M KOH | CO | N.A.                                                           | This work                      |
| <b>100</b> | 63.4 | 31.7<br>3144 | 3.2 | NiNC-IMI                                                                                                              | Sustainion | Fumasep FBM | Ni Foam           | 0.1M KOH | CO | N.A.                                                           | This work                      |
| <b>150</b> | 54.6 | 38.2<br>0403 | 3.4 | NiNC-IMI                                                                                                              | Sustainion | Fumasep FBM | Ni Foam           | 0.1M KOH | CO | N.A.                                                           | This work                      |
| <b>200</b> | 45.4 | 44.5<br>9414 | 3.6 | NiNC-IMI                                                                                                              | Sustainion | Fumasep FBM | Ni Foam           | 0.1M KOH | CO | N.A.                                                           | This work                      |
| <b>250</b> | 40.0 | 48.6<br>6628 | 3.8 | NiNC-IMI                                                                                                              | Sustainion | Fumasep FBM | Ni Foam           | 0.1M KOH | CO | N.A.                                                           | This work                      |
| <b>300</b> | 35.2 | 52.4<br>347  | 4.0 | NiNC-IMI                                                                                                              | Sustainion | Fumasep FBM | Ni Foam           | 0.1M KOH | CO | N.A.                                                           | This work                      |

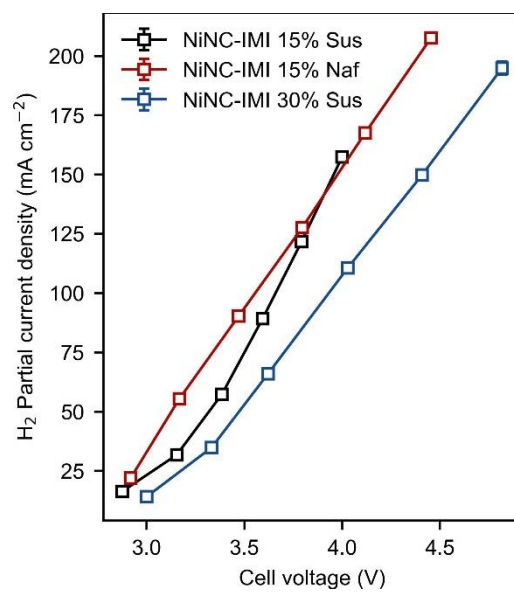

**Fig. S6 Comparison of H<sub>2</sub> partial current densities against cell potentials between NiNC-IMI derived catalysts with 15% Sustainion, Nafion, and 30% Sustainion ionomers. The error bar represents the standard deviation of three tests.**

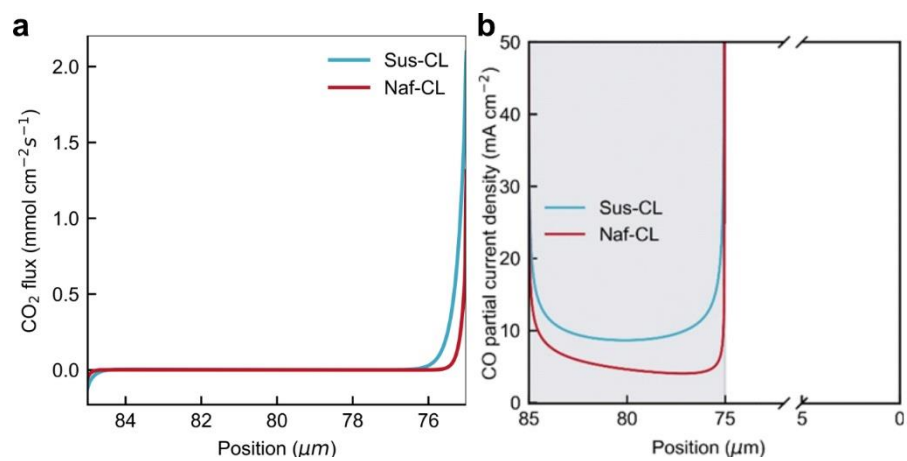

**Fig. S7 Model predicted (a) CO<sub>2</sub> fluxes and (b) local partial current density of CO evolution within Sus- and Naf-CL.**

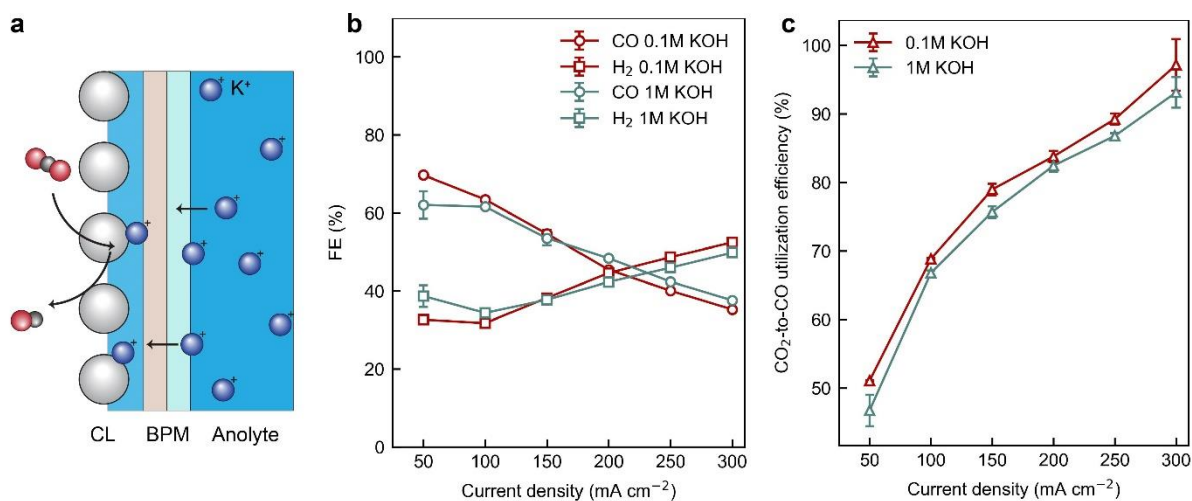

**Fig. S8 BPMEA performance with varied anolyte concentration. (a) A schematic illustration of anolyte concentration effect on cation crossover. Comparison of the (b) CO Faradaic efficiency and (c) CO<sub>2</sub>-to-CO utilization efficiency versus total current densities with 0.1 M or 1 M KOH aqueous anolyte. The BPMEA cell used cathodes with NiNC-IMI catalyst with 15% Sustainion ionomer as the catalyst layer. The error bar represents the standard deviation of three tests.**

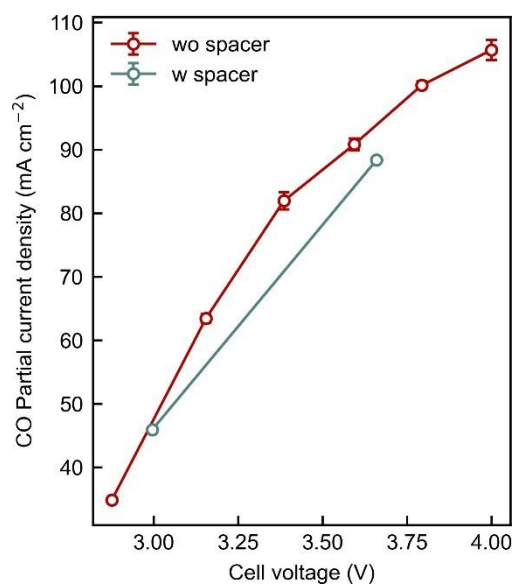

**Fig. S9 Comparison of CO partial current density as a function of cell voltage for cells with and without spacer at between CL|CEL. The error bar represents the standard deviation of three tests.**

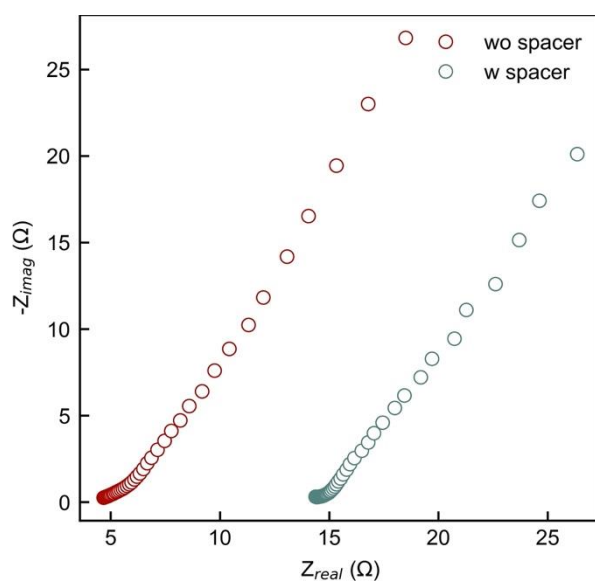

**Fig. S10 Electrochemical impedance spectra of the BPMEA cells with and without spacer at open circuit voltage before CO<sub>2</sub> electrolysis conditioning.**

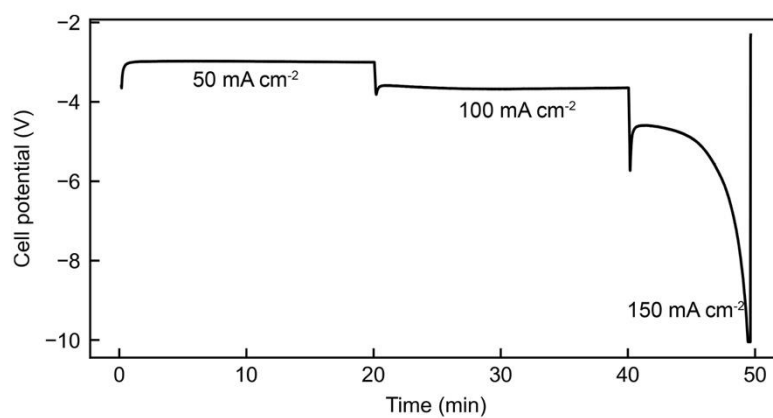

**Fig. S11** The cell overpotential overshoot for the BPMEA cell with the spacer at 150 mA cm<sup>-2</sup>.



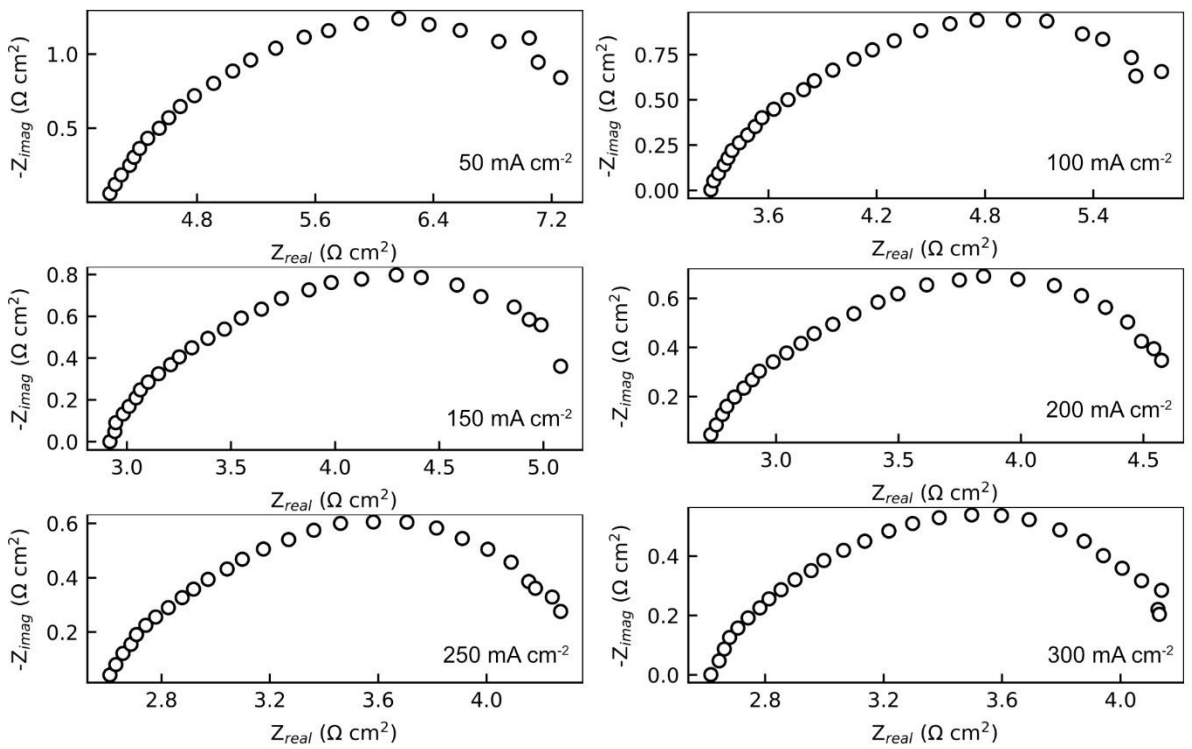

**Fig. S12 Nyquist plots of electrochemical impedance spectroscopy for BPMEA with CL based with NiNC-IMI 15 wt% Sustainion ionomer as a function of current densities.**

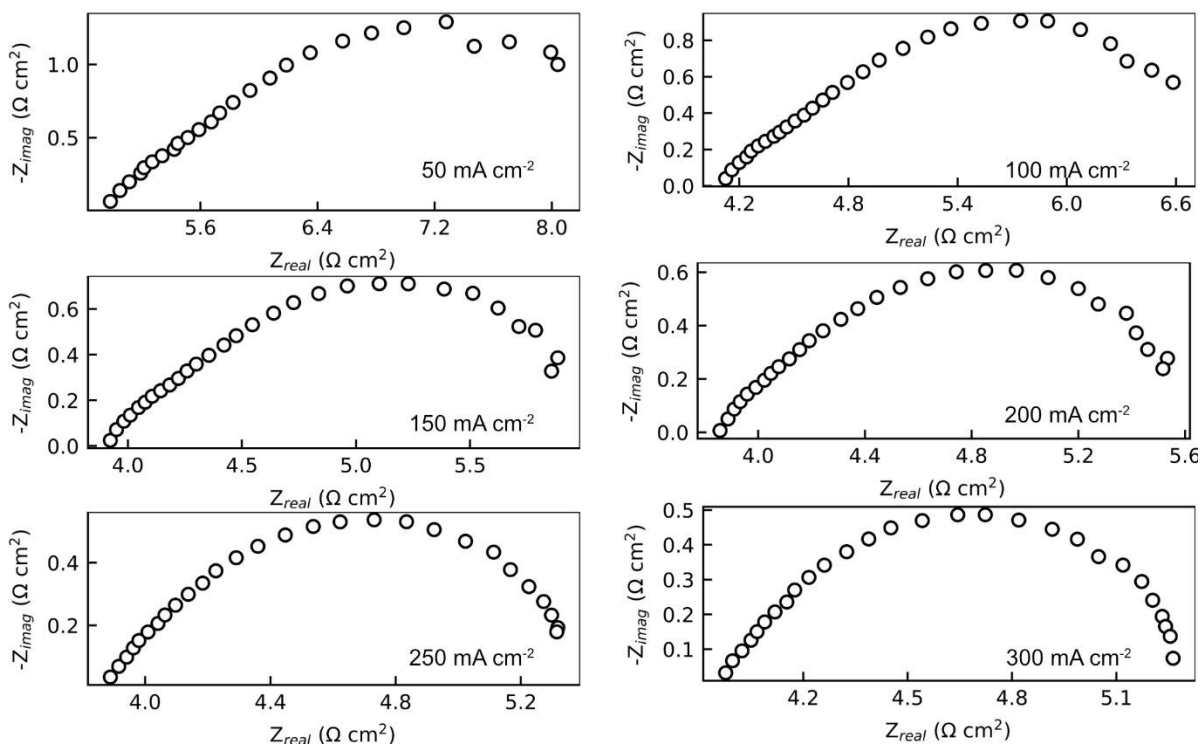

**Fig. S13** Nyquist plots of electrochemical impedance spectroscopy for BPMEA with CL based with NiNC-IMI 15 wt% Naf as a function of current densities.

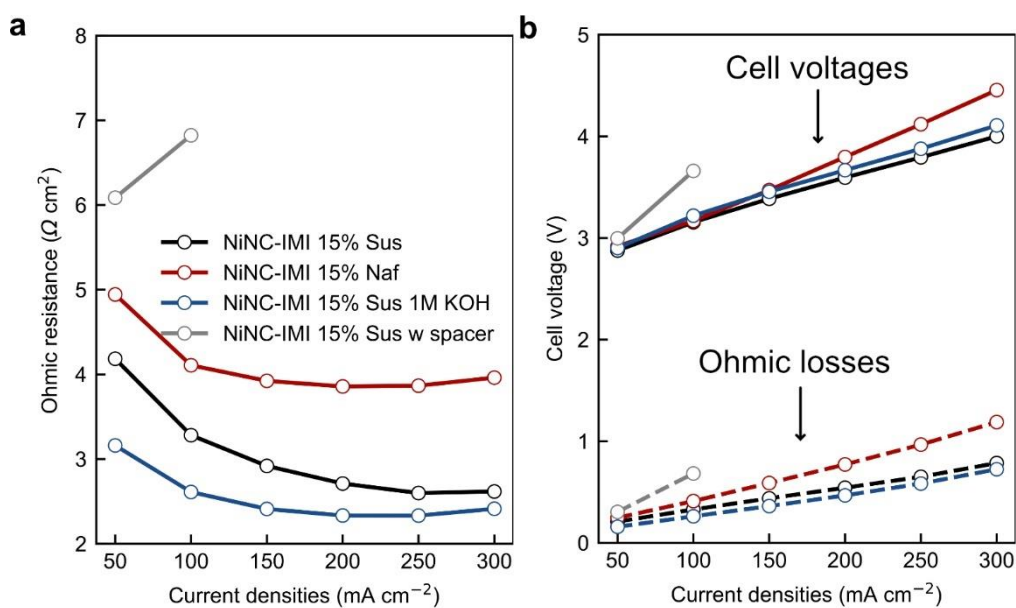

**Fig. S14 Ohmic losses for BPMEAs. Comparison of (a) the ohmic resistances and (b) cell voltages (solid line) and ohmic losses (dashed lines) of the BPMEA as a function of current densities for CLs based with NiNC-IMI 15 wt% Sus, NiNC-IMI 15 wt%Naf, NiNC-IMI 15 wt% Sus using 1M KOH, and NiNC-IMI 15 wt% Sus with spacer at CEL|cathode interface. The rest of the samples used 0.1 M KOH as the anlyte.**

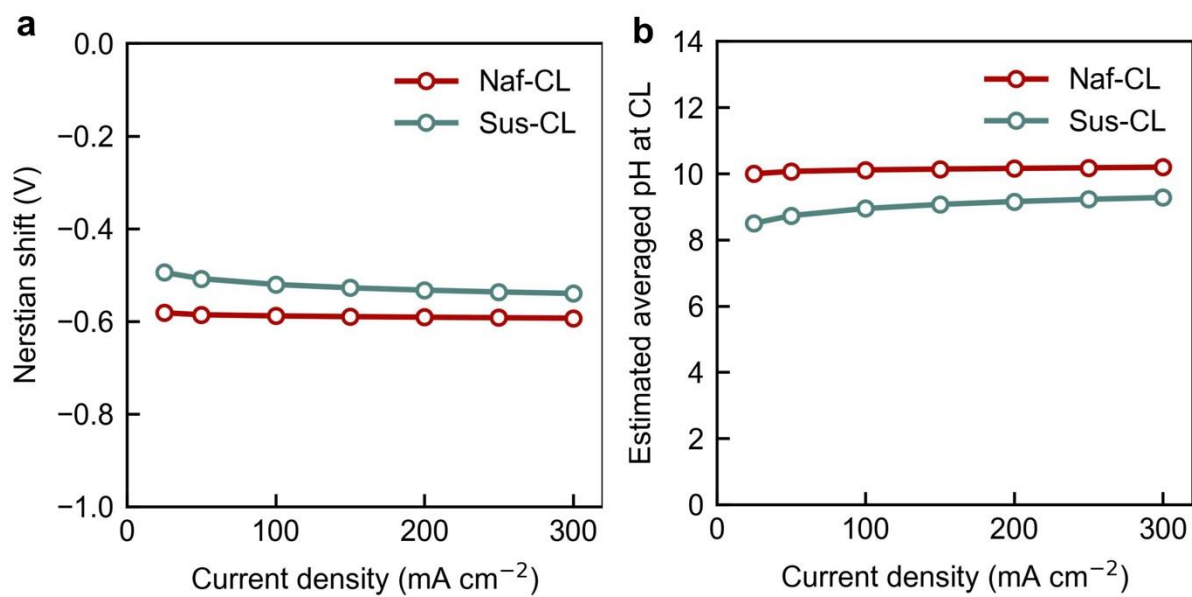

**Fig. S15** Nernstian shifts for CL with different ionomers. Comparison of the (a) averaged Nernstian shift and (b) pH values caused by ionomers in the catalyst layers at different current densities estimated from models. Note: the more positive values of the Nernstian shift lead to reduced cell voltages.

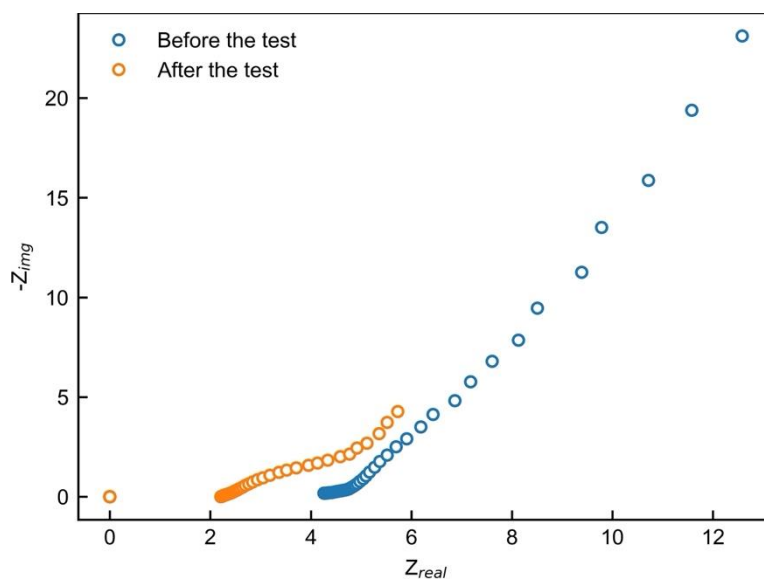

**Fig. S16 Comparison of the electrochemical impedance analyses of the BPMEA cell at open circuit potential before and after the 150 h stability test.**

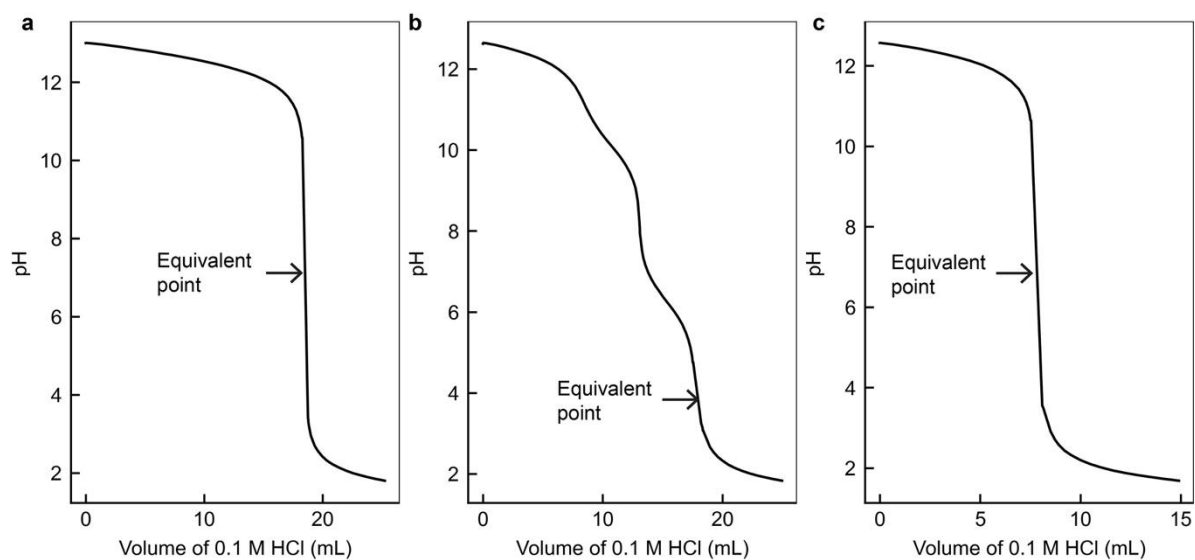

**Fig. S17 Titration curves to determine averaged ion crossover. Examples of the titration curves for (a) fresh 0.1 M KOH anolyte, (b) anolyte after stability test, and (c) supernatant of the anolyte with excess  $\text{BaCl}_2$  and carbonate removed after stability test.**

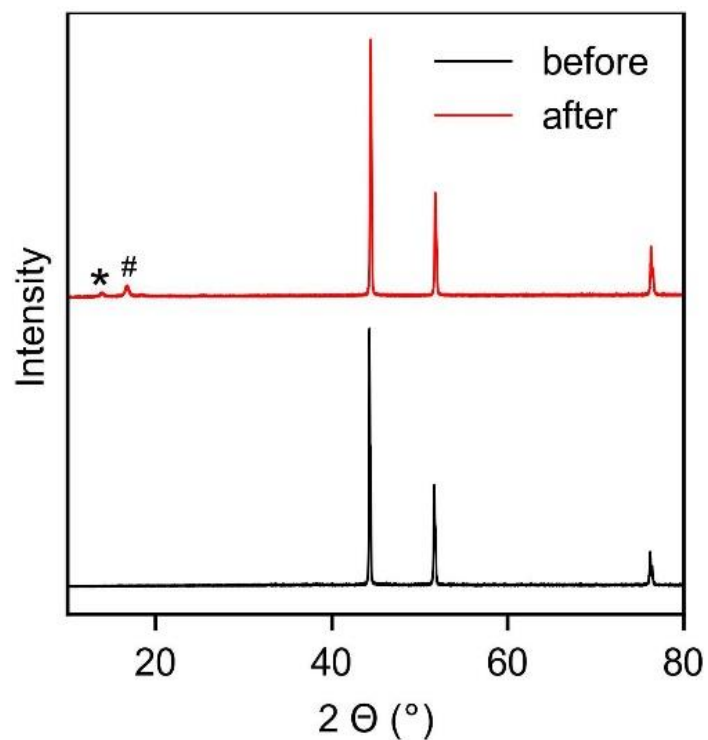

**Fig. S18 Comparison of X-ray diffraction of the nickel mesh anode before and after 150 h stability test. The peak indicated by asterisk is related to the  $\text{K}_{0.14}\text{NiO}_2$  phase (PDF 74-1792), and the peak highlighted by hashtag should be relevant to the phase similar to  $\text{K}_9\text{Ni}_2\text{O}_7$  (PDF 71-1987).**

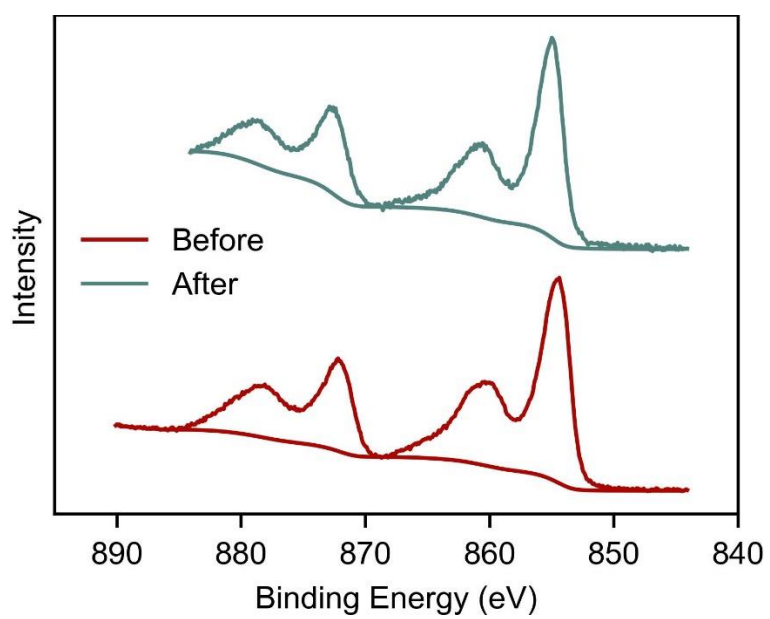

**Fig. S19** X-ray photoelectron spectra of Ni 2p over the nickel mesh anode before and after 150 h stability test.



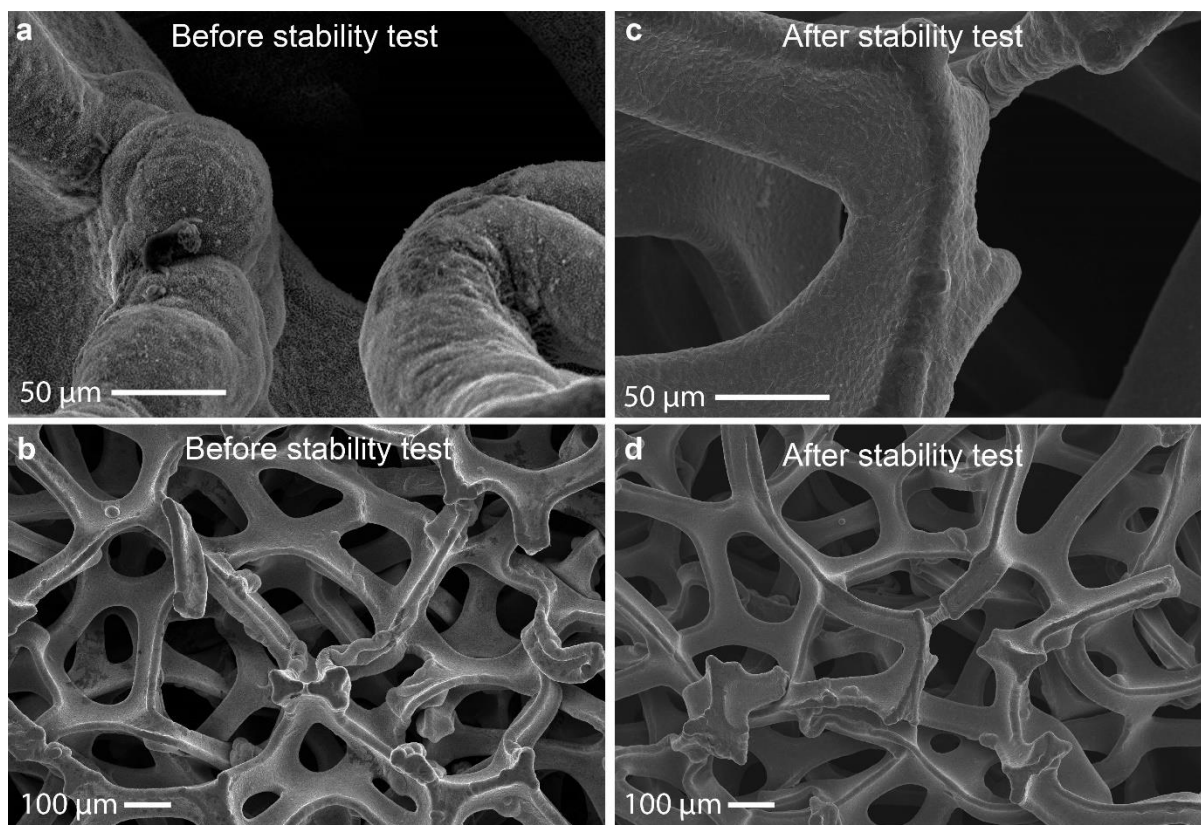

**Fig. S20** Scanning electron micrographs of the nickel mesh anode surface microstructure (a, b) before and (c,d) after the stability test.

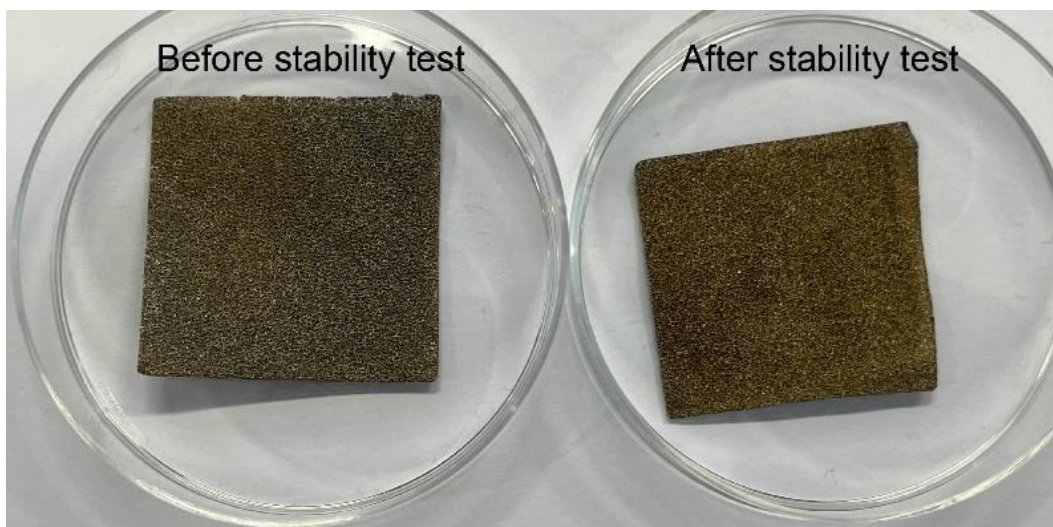

**Fig. S21** Photos of the nickel mesh anode before and after the stability test.

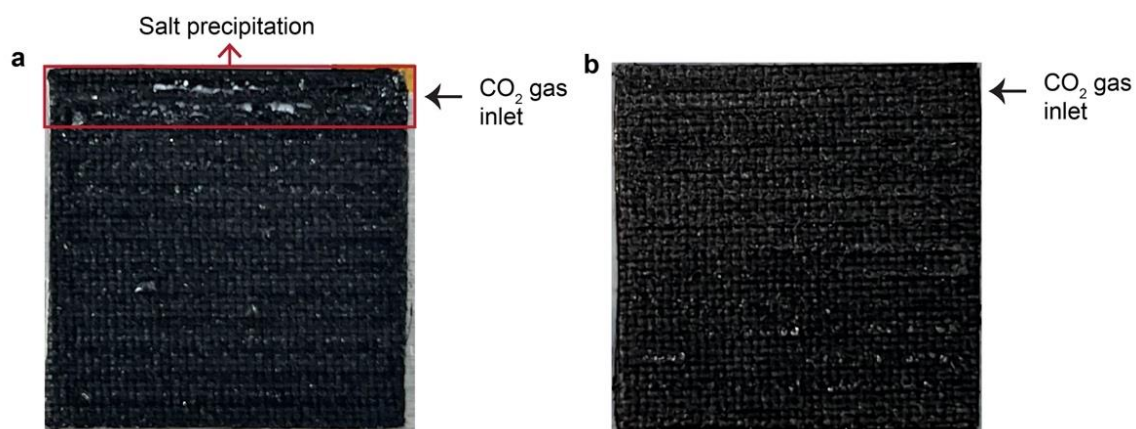

**Fig. S22** Images of the GDL side facing the CO<sub>2</sub> channels after (a) 40 h and (b) 150 h CO<sub>2</sub> electrolyses under 100 mA cm<sup>-2</sup> with 1 L 0.1M KOH as the anolyte.

## Supplementary References

1. Weng, L.-C., Bell, A. T. & Weber, A. Z. *Phys. Chem. Chem. Phys.* **2018**, *20* (25), 16973–16984.
2. Lees, E. W., Bui, J. C., Song, D., Weber, A. Z. & Berlinguette, C. P. *ACS Energy Lett.* **2022**, *7* (2), 834–842.
3. Zenyuk, I. V., Medici, E., Allen, J. & Weber, A. Z. *Int. J. Hydrog. Energy* **2015**, *40* (46), 16831–16845.
4. Weng, L.-C., Bell, A. T. & Weber, A. Z. *Energy Environ. Sci.* **2019**, *12* (6), 1950–1968.
5. Fuller, E. N., Schettler, P. D. & Giddings, J. Calvin. *Ind. Eng. Chem.* **1966**, *58* (5), 18–27.
6. Grew, K. N. & Chiu, W. K. S. *J. Electrochem. Soc.* **2010**, *157* (3), B327.
7. Bui, J. C., Digdaya, I., Xiang, C., Bell, A. T. & Weber, A. Z. *ACS Appl. Mater. Interfaces* **2020**, *12* (47), 52509–52526.
8. Luo, X., Kushner, D. I. & Kusoglu, A. *J. Membr. Sci.* **2023**, *685*, 121945.
9. Yang, K., Li, M., Subramanian, S., Blommaert, M. A., Smith, W. A., *et al.* *ACS Energy Lett.* **2021**, *6* (12), 4291–4298.
10. Siritanaratkul, B., Forster, M., Greenwell, F., Sharma, P. K., Yu, E. H., *et al.* *J. Am. Chem. Soc.* **2022**, *144* (17), 7551–7556.
11. Siritanaratkul, B., Sharma, P. K., Yu, E. H. & Cowan, A. J. *Adv. Mater. Interfaces* **2023**, *10* (15), 2300203.
12. Yue, P., Fu, Q., Li, J., Zhang, L., Ye, D., *et al.* *ACS Appl. Mater. Interfaces* **2023**, *15* (46), 53429–53435.
13. Xie, K., Miao, R. K., Ozden, A., Liu, S., Chen, Z., *et al.* *Nat. Commun.* **2022**, *13* (1), 3609.

14. Li, G., Huang, L., Wei, C., Shen, H., Liu, Y., *et al.* *Angew. Chem. Int. Ed.* n/a (n/a), e202400414.
15. Eagle, C., Neri, G., Piercy, V. L., Younis, K., Siritanaratkul, B., *et al.* *Sustain. Energy Fuels* **2023**, 7 (9), 2301–2307.
